# Supplementary material for: Trajectories of Blood Lipid Concentrations Over the Adult Life Course and Risk of Cardiovascular Disease and All‐Cause Mortality: Observations From the Framingham Study Over 35 Years
Source: PubMed Central journal article supplement — J Am Heart Assoc. 2019 May 29;8(11):e011433. doi: 10.1161/JAHA.118.011433 (PMC6585376; doi:10.1161/jaha.118.011433), 2019-05-29
Supplement: JAH3-8-e011433-s001.pdf [file JAH3-8-e011433-s001.pdf]

# **Supplemental Material**

**Table S1. Longitudinal Correlates of Lipid concentrations in Women.**

| Correlate <sup>†</sup>             | Total Cholesterol <sup>‡</sup> |                | HDL Cholesterol   |                | LDL Cholesterol <sup>‡</sup> |                | Log Triglycerides |                | Non-HDL Cholesterol <sup>‡</sup> |                |
|------------------------------------|--------------------------------|----------------|-------------------|----------------|------------------------------|----------------|-------------------|----------------|----------------------------------|----------------|
|                                    | <i>β Estimate</i>              | <i>p-value</i> | <i>β Estimate</i> | <i>p-value</i> | <i>β Estimate</i>            | <i>p-value</i> | <i>β Estimate</i> | <i>p-value</i> | <i>β Estimate</i>                | <i>p-value</i> |
| Age, 5 years                       | 4.52                           | <0.0001        | 1.52              | <0.0001        | 1.20                         | 0.0008         | 0.08              | <0.0001        | 2.48                             | <0.0001        |
| Body Mass Index, kg/m <sup>2</sup> | 0.68                           | <0.0001        | -1.03             | <0.0001        | 0.90                         | <0.0001        | 0.04              | <0.0001        | 1.80                             | <0.0001        |
| Smoking                            | 4.47                           | <0.0001        | -4.17             | <0.0001        | 7.31                         | <0.0001        | 0.09              | <0.0001        | 8.98                             | <0.0001        |
| Moderate to Heavy Drinking         | 3.99                           | <0.0001        | 3.54              | <0.0001        | ---                          | ---            | ---               | ---            | ---                              | ---            |
| Total Caloric Intake, 100 kcal     | -0.22                          | 0.001          | ---               | ---            | -0.25                        | <0.0001        | 0.002             | 0.005          | -0.18                            | 0.007          |
| Physical Activity Index, 1 point   | ---                            | ---            | ---               | ---            | ---                          | ---            | -0.002            | 0.001          | -0.13                            | 0.02           |
| Diabetes                           | ---                            | ---            | -2.59             | <0.0001        | -6.00                        | 0.0002         | 0.13              | <0.0001        | ---                              | ---            |
| Lipid-lowering medication use      | ---                            | ---            | 1.98              | <0.0001        | 54.10                        | <0.0001        | -0.14             | <0.0001        | 69.26                            | <0.0001        |
| Systolic Blood Pressure            | 0.19                           | <0.0001        | 0.05              | <0.0001        | 0.09                         | <0.0001        | 0.002             | <0.0001        | 0.13                             | <0.0001        |
| Antihypertensive medication use    | ---                            | ---            | ---               | ---            | ---                          | ---            | 0.04              | 0.0002         | 2.52                             | 0.006          |
| Menopause Status                   | 46.32                          | <0.0001        | 2.13              | <0.0001        | 23.16                        | <0.0001        | 0.52              | <0.0001        | 30.39                            | <0.0001        |
| <i>Interactions</i>                |                                |                |                   |                |                              |                |                   |                |                                  |                |
| Age × Lipid Lowering medication    | ---                            | ---            | ---               | ---            | -4.16                        | <0.0001        | ---               | ---            | -5.80                            | <0.0001        |
| Age × Menopause                    | -3.45                          | <0.0001        | ---               | ---            | -1.62                        | <0.0001        | -0.04             | <0.0001        | -2.20                            | <0.0001        |

\*HDL – high-density lipoprotein; LDL – low-density lipoprotein.

<sup>†</sup> Final covariates chosen based on backward selection.

<sup>‡</sup> Values of total cholesterol, LDL cholesterol, and non-HDL cholesterol were adjusted to account for lipid-lowering medication use.

**Table S2. Longitudinal Correlates of Lipid concentrations in Men.**

| Correlate <sup>†</sup>             | Total Cholesterol <sup>‡</sup> |                | HDL Cholesterol   |                | LDL Cholesterol <sup>‡</sup> |                | Log Triglycerides |                | Non-HDL Cholesterol <sup>‡</sup> |                |
|------------------------------------|--------------------------------|----------------|-------------------|----------------|------------------------------|----------------|-------------------|----------------|----------------------------------|----------------|
|                                    | <i>β Estimate</i>              | <i>p-value</i> | <i>β Estimate</i> | <i>p-value</i> | <i>β Estimate</i>            | <i>p-value</i> | <i>β Estimate</i> | <i>p-value</i> | <i>β Estimate</i>                | <i>p-value</i> |
| Age, 5 years                       | 9.73                           | <0.0001        | 1.66              | <0.0001        | 4.40                         | <0.0001        | 0.04              | <0.0001        | 0.08                             | 0.6            |
| Body Mass Index, kg/m <sup>2</sup> | 3.92                           | <0.0001        | -1.13             | <0.0001        | 0.85                         | <0.0001        | 0.04              | <0.0001        | 2.02                             | <0.0001        |
| Smoking                            | 3.69                           | <0.0001        | -3.06             | <0.0001        | 5.28                         | <0.0001        | 0.07              | <0.0001        | 6.58                             | <0.0001        |
| Moderate to Heavy Drinking         | 4.46                           | <0.0001        | 3.32              | <0.0001        | ---                          | ---            | ---               | ---            | ---                              | ---            |
| Total Caloric Intake, 100 kcal     | ---                            | ---            | -0.05             | 0.002          | ---                          | ---            | 0.003             | <0.0001        | ---                              | ---            |
| Physical Activity Index, 1 point   | -0.09                          | 0.02           | ---               | ---            | ---                          | ---            | -0.002            | <0.0001        | -0.08                            | 0.03           |
| Diabetes                           | 22.82                          | 0.002          | -1.76             | <0.0001        | -6.80                        | <0.0001        | 0.86              | <0.0001        | 46.41                            | <0.0001        |
| Systolic Blood Pressure            | 0.17                           | <0.0001        | 0.05              | <0.0001        | 0.53                         | <0.0001        | 0.002             | <0.0001        | 0.14                             | <0.0001        |
| Antihypertensive medication use    | 35.20                          | <0.0001        | ---               | ---            | 30.47                        | <0.0001        | 0.02              | 0.046          | ---                              | ---            |
| Lipid-lowering medication use      | -2.10                          | 0.009          | 2.31              | <0.0001        | ---                          | ---            | -0.18             | <0.0001        | -5.79                            | <0.0001        |
| <i>Interactions</i>                |                                |                |                   |                |                              |                |                   |                |                                  |                |
| Age × Body Mass Index              | -0.28                          | <0.0001        | ---               | ---            | ---                          | ---            | ---               | ---            | ---                              | ---            |
| Age × Diabetes Status              | -2.22                          | 0.0002         | ---               | ---            | ---                          | ---            | -0.06             | <0.0001        | -4.11                            | <0.0001        |
| Age × Antihypertensive medication  | -2.90                          | <0.0001        | ---               | ---            | -2.50                        | <0.0001        | ---               | ---            | ---                              | ---            |
| Age × Systolic Blood Pressure      | ---                            | ---            | ---               | ---            | -0.04                        | <0.0001        | ---               | ---            | ---                              | ---            |

\*HDL – high-density lipoprotein; LDL – low-density lipoprotein.

<sup>†</sup> Final covariates chosen based on backward selection.

<sup>‡</sup> Values of total cholesterol, LDL cholesterol, and non-HDL cholesterol were adjusted to account for lipid-lowering medication use.

**Table S3. Trajectory Model Fit Diagnostics.**

| <b>Lipid</b>      | <b>Group</b>                                                                   | $\pi_j$ | 95% CI for $\pi_j$ | $P_j$  | AvePP $_j$ | OCC $_j$ |
|-------------------|--------------------------------------------------------------------------------|---------|--------------------|--------|------------|----------|
| Total Cholesterol | Optimal (155-165 mg/dL)                                                        | 0.1998  | [0.1813, 0.2188]   | 0.2303 | 0.9020     | 36.84    |
|                   | Borderline (190-200 mg/dL)                                                     | 0.4148  | [0.3927, 0.4359]   | 0.4421 | 0.8866     | 11.03    |
|                   | Elevated (220-235 mg/dL)                                                       | 0.2710  | [0.2493, 0.2936]   | 0.2467 | 0.8631     | 16.95    |
|                   | Elevated and decreasing (drops from 260 mg/dL to 190 mg/dL over time)          | 0.0668  | [0.0542, 0.0822]   | 0.0505 | 0.8524     | 80.60    |
|                   | Very elevated and decreasing (drops from 285 mg/dL to 240 mg/dL over time)     | 0.0474  | [0.0399, 0.0563]   | 0.0303 | 0.9395     | 311.97   |
| HDL Cholesterol   | Very low and stable (35-40 mg/dL)                                              | 0.2598  | [0.2402, 0.2795]   | 0.1968 | 0.9281     | 36.78    |
|                   | Low and stable (45-50 mg/dL)                                                   | 0.3491  | [0.3304, 0.3681]   | 0.3328 | 0.9012     | 17.01    |
|                   | Borderline (55-60 mg/dL)                                                       | 0.2484  | [0.2323, 0.2651]   | 0.2920 | 0.9148     | 32.48    |
|                   | High and increasing (increases from 70/80 mg/dL to 75/100 mg/dL over time)     | 0.1117  | [0.1004, 0.1235]   | 0.1381 | 0.9264     | 100.09   |
|                   | Optimal (80-90 mg/dL)                                                          | 0.0309  | [0.0251, 0.0383]   | 0.0404 | 0.9352     | 452.02   |
| LDL Cholesterol   | Borderline (115-120 mg/dL)                                                     | 0.1305  | [0.1133, 0.1496]   | 0.1477 | 0.8944     | 56.45    |
|                   | Slightly elevated and decreasing (drops from 145 mg/dL to 125 mg/dL over time) | 0.3286  | [0.3062, 0.3511]   | 0.3760 | 0.8763     | 14.47    |
|                   | Elevated and decreasing (drops from 170 mg/dL to 135 mg/dL over time)          | 0.3306  | [0.3084, 0.3525]   | 0.3241 | 0.8748     | 14.15    |

|                        |                                                                               |        |                  |        |        |        |
|------------------------|-------------------------------------------------------------------------------|--------|------------------|--------|--------|--------|
|                        | Very elevated and decreasing<br>(drops from 220 mg/dL to 155 mg/dL over time) | 0.1730 | [0.1550, 0.1924] | 0.1322 | 0.8961 | 41.22  |
|                        | Optimal<br>(55-70 mg/dL)                                                      | 0.0373 | [0.0297, 0.0463] | 0.0201 | 0.9285 | 335.31 |
| Triglycerides          | Borderline<br>(81-99 mg/dL)                                                   | 0.2214 | [0.2023, 0.2416] | 0.2587 | 0.9011 | 32.04  |
|                        | Elevated<br>(134-164 mg/dL)                                                   | 0.4268 | [0.4054, 0.4476] | 0.4522 | 0.8846 | 10.30  |
|                        | Very Elevated<br>(245-314 mg/dL)                                              | 0.2862 | [0.2664, 0.3068] | 0.2456 | 0.9096 | 25.10  |
|                        | Optimal<br>(100-115 mg/dL)                                                    | 0.0656 | [0.0568, 0.0755] | 0.0435 | 0.9434 | 237.32 |
| Non-HDL<br>Cholesterol | Borderline<br>(145-137 mg/dL)                                                 | 0.2005 | [0.1836, 0.2182] | 0.2420 | 0.9258 | 49.74  |
|                        | Elevated and Decreasing<br>(drops from 185 mg/dL to 157 mg/dL over time)      | 0.4286 | [0.4081, 0.4489] | 0.4726 | 0.9099 | 13.46  |
|                        | Very elevated and decreasing<br>(drops from 235 mg/dL to 180 mg/dL over time) | 0.3016 | [0.2812, 0.3227] | 0.2433 | 0.9120 | 24.00  |
|                        | Very low and stable<br>(35-40 mg/dL)                                          | 0.0693 | [0.0600, 0.0796] | 0.0421 | 0.9386 | 205.42 |

$\pi_j$  is the probability of group membership;  $P_j$  is the proportion of the sample assigned to group  $j$ ; AvePP $_j$  is the posterior probability of group membership among individuals assigned to group  $j$ ; OCC $_j$  is the odds of correct classification in group  $j$

**Table S4. Change in c-statistic with addition of Lipid Variables.**

| <b>Lipid</b>                  | <b>Model</b>               | <b>c-statistic<br/>(Incident ASCVD)</b> | <b>c-statistic<br/>(All-Cause Mortality)</b> |
|-------------------------------|----------------------------|-----------------------------------------|----------------------------------------------|
| Total<br>Cholesterol<br>(TC)  | Base*                      | 0.648                                   | 0.620                                        |
|                               | Base + Trajectory Group    | 0.664†                                  | 0.622†                                       |
|                               | Base + TC at exam 8        | 0.650                                   | 0.634                                        |
|                               | Base + Average TC          | 0.655                                   | 0.623                                        |
| HDL<br>Cholesterol<br>(HDL-C) | Base‡                      | 0.629                                   | 0.622                                        |
|                               | Base + Trajectory Group    | 0.670†                                  | 0.686†                                       |
|                               | Base + HDL-C at exam 8     | 0.668                                   | 0.649                                        |
|                               | Base + Average HDL-C       | 0.666                                   | 0.670                                        |
| LDL<br>Cholesterol<br>(LDL-C) | Base§                      | 0.670                                   | 0.625                                        |
|                               | Base + Trajectory Group    | 0.692†                                  | 0.629†                                       |
|                               | Base + LDL-C at exam 8     | 0.670                                   | 0.632                                        |
|                               | Base + Average LDL-C       | 0.681                                   | 0.629                                        |
| Triglycerides<br>(TG)         | Base <sup>l</sup>          | 0.681                                   | 0.634                                        |
|                               | Base + Trajectory Group    | 0.698†                                  | 0.634†                                       |
|                               | Base + log(TG) at exam 8   | 0.689                                   | 0.634                                        |
|                               | Base + Average log(TG)     | 0.713                                   | 0.661                                        |
| Non-HDL<br>Cholesterol        | Base <sup>#</sup>          | 0.658                                   | 0.629                                        |
|                               | Base + Trajectory Group    | 0.684†                                  | 0.634†                                       |
|                               | Base + Non-HDL-C at exam 8 | 0.657                                   | 0.636                                        |
|                               | Base + Average Non-HDL-C   | 0.686                                   | 0.642                                        |

\*Base model contains lipid-lowering medication, smoking status, diabetes status, body mass index, systolic blood pressure, alcohol consumption, and antihypertensive medication use.

†This is the average c-statistic over all “imputed” datasets

‡Base model contains lipid-lowering medication, smoking status, diabetes status, body mass index, systolic blood pressure, alcohol consumption, physical activity index.

§ Base model contains lipid-lowering medication, smoking status, diabetes status, body mass index, systolic blood pressure, alcohol consumption, total caloric intake, and antihypertensive medication use.

l Base model contains lipid-lowering medication, smoking status, body mass index, systolic blood pressure, total caloric intake, physical activity index, and antihypertensive medication use.

# Base model contains lipid-lowering medication, smoking status, body mass index, systolic blood pressure, total caloric intake, and physical activity index.

**Table S5. Results from Weighted Cox Model\*.**

| Lipid                           | Group                                                                            | Incident ASCVD        |         |                                       | All-Cause Mortality |                       |         |                                       |         |
|---------------------------------|----------------------------------------------------------------------------------|-----------------------|---------|---------------------------------------|---------------------|-----------------------|---------|---------------------------------------|---------|
|                                 |                                                                                  | Events<br>no. at risk | (%)     | Hazard Ratio<br>[95% CI] <sup>†</sup> | p-value             | Events<br>no. at risk | (%)     | Hazard Ratio<br>[95% CI] <sup>†</sup> | p-value |
| Total<br>Cholesterol            | Optimal<br>(155-165 mg/dL)                                                       | 23/547                | (4.20)  | 1.00                                  | ---                 | 57/547                | (10.42) | 1.00                                  | ---     |
|                                 | Borderline<br>(190-200 mg/dL)                                                    | 106/1050              | (10.01) | 2.13 [1.46, 3.11]                     | <0.0001             | 99/1050               | (9.43)  | 0.95 [0.70, 1.27]                     | 0.7     |
|                                 | Elevated<br>(220-235 mg/dL)                                                      | 44/586                | (7.51)  | 1.61 [1.01, 2.56]<br>2.621]           | 0.046               | 64/586                | (10.92) | 1.19 [0.84, 1.68]                     | 0.3     |
|                                 | Elevated and decreasing<br>(drops from 260 mg/dL to 190<br>mg/dL over time)      | 11/120                | (9.17)  | 1.95 [1.07, 3.53]                     | 0.03                | 20/120                | (16.67) | 1.65 [1.04, 2.62]                     | 0.03    |
|                                 | Very elevated and decreasing<br>(drops from 285 mg/dL to 240<br>mg/dL over time) | 15/72                 | (20.83) | 4.03 [2.10, 7.73]                     | <0.0001             | 16/72                 | (22.22) | 2.58 [1.51, 4.39]                     | 0.0005  |
| HDL<br>Cholesterol <sup>‡</sup> | Very low and stable<br>(35-40 mg/dL)                                             | 69/463                | (14.90) | 3.72 [2.06, 6.74]                     | <0.0001             | 76/463                | (16.41) | 2.88 [1.73, 4.80]                     | <0.0001 |
|                                 | Low and stable<br>(45-50 mg/dL)                                                  | 76/783                | (9.71)  | 2.48 [1.45, 4.23]                     | 0.0009              | 90/783                | (11.49) | 2.02 [1.28, 3.20]                     | 0.003   |
|                                 | Borderline<br>(55-60 mg/dL)                                                      | 34/687                | (4.95)  | 1.23 [0.72, 2.10]                     | 0.4                 | 58/687                | (8.44)  | 1.46 [0.94, 2.27]                     | 0.09    |
|                                 | High and increasing<br>(increases from 70/80 mg/dL to<br>75/100 mg/dL over time) | 16/420                | (3.81)  | 1.00                                  | ---                 | 26/420                | (6.19)  | 1.00                                  | ---     |
| LDL<br>Cholesterol              | Optimal<br>(80-90 mg/dL)                                                         | 6/323                 | (1.86)  | 1.00                                  | ---                 | 25/324                | (7.72)  | 1.00                                  | ---     |

|                        |                                                                                   |                |                    |         |                 |                   |         |
|------------------------|-----------------------------------------------------------------------------------|----------------|--------------------|---------|-----------------|-------------------|---------|
|                        | Borderline<br>(115-120 mg/dL)                                                     | 60/825 (7.27)  | 2.80 [1.45, 5.42]  | 0.002   | 68/825 (8.24)   | 1.13 [0.76, 1.67] | 0.5     |
|                        | Slightly elevated and decreasing<br>(drops from 145 mg/dL to 125 mg/dL over time) | 75/710 (10.56) | 3.89 [1.94, 7.80]  | 0.0001  | 76/711 (10.69)  | 1.45 [0.94, 2.24] | 0.1     |
|                        | Elevated and decreasing<br>(drops from 170 mg/dL to 135 mg/dL over time)          | 26/290 (8.97)  | 2.87 [1.31, 6.29]  | 0.008   | 45/290 (15.52)  | 2.30 [1.39, 3.81] | 0.001   |
|                        | Very elevated and decreasing<br>(drops from 220 mg/dL to 155 mg/dL over time)     | 6/44 (13.64)   | 4.88 [1.83, 12.97] | 0.002   | 11/44 (25.00)   | 3.98 [2.03, 7.80] | <0.0001 |
| Log<br>Triglycerides   | Optimal<br>(55-70 mg/dL)                                                          | 26/571 (4.55)  | 1.00               | ---     | 55/571 (9.63)   | 1.00              | ---     |
|                        | Borderline<br>(81-99 mg/dL)                                                       | 71/997 (7.12)  | 1.34 [0.91, 1.98]  | 0.1     | 97/997 (9.73)   | 0.99 [0.74, 1.32] | 0.9     |
|                        | Elevated<br>(134-164 mg/dL)                                                       | 63/541 (11.65) | 1.83 [1.17, 2.84]  | 0.008   | 62/541 (11.46)  | 1.02 [0.72, 1.46] | 0.9     |
|                        | Very Elevated<br>(245-314 mg/dL)                                                  | 11/96 (11.46)  | 1.88 [0.97, 3.62]  | 0.06    | 9/96 (9.38)     | 0.81 [0.41, 1.57] | 0.5     |
| Non-HDL<br>Cholesterol | Optimal<br>(100-115 mg/dL)                                                        | 13/534 (2.43)  | 1.00               | ---     | 38/534 (7.12)   | 1.00              | ---     |
|                        | Borderline<br>(145-137 mg/dL)                                                     | 92/1043 (8.82) | 3.29 [1.95, 5.52]  | <0.0001 | 104/1043 (9.97) | 1.37 [0.97, 1.93] | 0.07    |
|                        | Elevated and Decreasing<br>(drops from 185 mg/dL to 157 mg/dL over time)          | 52/537 (9.68)  | 3.14 [1.74, 5.65]  | 0.0001  | 59/537 (10.99)  | 1.60 [1.05, 2.43] | 0.03    |



|  |                                                                                  |               |                   |        |               |                   |         |
|--|----------------------------------------------------------------------------------|---------------|-------------------|--------|---------------|-------------------|---------|
|  | Very elevated and decreasing<br>(drops from 235 mg/dL to 180<br>mg/dL over time) | 14/93 (15.05) | 4.46 [2.08, 9.60] | 0.0001 | 22/93 (23.66) | 3.63 [2.10, 6.28] | <0.0001 |
|--|----------------------------------------------------------------------------------|---------------|-------------------|--------|---------------|-------------------|---------|

\*CI – confidence interval; ASCVD – atherosclerotic cardiovascular disease; HDL – high-density lipoprotein; LDL – low-density lipoprotein.

† All models were adjusted for statin use, smoking status, diabetes status, body mass index, and systolic blood pressure. Alcohol consumption was also adjusted for in total cholesterol, HDL-C and LDL-C models. Total caloric intake was adjusted for in LDL-C and triglyceride models. Physical activity index was adjusted for in HDL-C, triglyceride, and non-HDL-C models. Use of antihypertensive medications were adjusted for in total cholesterol, LDL-C and triglyceride models. Baseline hazards were allowed to differ for men and women in all models.

‡ HDL Trajectory Groups 4 & 5 were combined for analyses to increase statistical power since there were only 2 incident ASCVD events and 5 deaths in group 5.

**Table S6. Risk of ASCVD and All-Cause Mortality by Lipid Trajectory Group with common set of covariates.**

| Lipid                           | Group                                                                                | Incident ASCVD                        |         | All-Cause Mortality                   |         |
|---------------------------------|--------------------------------------------------------------------------------------|---------------------------------------|---------|---------------------------------------|---------|
|                                 |                                                                                      | Hazard Ratio<br>[95% CI] <sup>†</sup> | p-value | Hazard Ratio<br>[95% CI] <sup>†</sup> | p-value |
| Total<br>Cholesterol            | Optimal<br>(155-165 mg/dL)                                                           | 1.00                                  | ---     | 1.00                                  | ---     |
|                                 | Borderline<br>(190-200 mg/dL)                                                        | 2.25 [1.29, 3.93]                     | 0.004   | 0.90 [0.62, 1.30]                     | 0.6     |
|                                 | Elevated<br>(220-235 mg/dL)                                                          | 1.74 [0.94, 3.21]                     | 0.08    | 1.17 [0.77, 1.78]                     | 0.5     |
|                                 | Elevated and decreasing<br>(drops from 260 mg/dL to 190<br>mg/dL over time)          | 2.06 [0.87, 4.92]                     | 0.1     | 1.63 [0.86, 3.06]                     | 0.1     |
|                                 | Very elevated and decreasing<br>(drops from 285 mg/dL to 240<br>mg/dL over time)     | 3.63 [1.54, 8.57]                     | 0.003   | 2.38 [1.14, 4.97]                     | 0.02    |
| HDL<br>Cholesterol <sup>‡</sup> | Very low and stable<br>(35-40 mg/dL)                                                 | 4.95 [2.39, 10.27]                    | <0.0001 | 3.53 [1.98, 6.28]                     | <0.0001 |
|                                 | Low and stable<br>(45-50 mg/dL)                                                      | 3.22 [1.64, 6.32]                     | 0.0007  | 2.27 [1.35, 3.83]                     | 0.002   |
|                                 | Borderline<br>(55-60 mg/dL)                                                          | 1.62 [0.80, 3.28]                     | 0.18    | 1.66 [0.97, 2.81]                     | 0.06    |
|                                 | High and increasing<br>(increases from 70/80 mg/dL to<br>75/100 mg/dL over time)     | 1.00                                  | ---     | 1.00                                  | ---     |
| LDL<br>Cholesterol              | Optimal<br>(80-90 mg/dL)                                                             | 1.00                                  | ---     | 1.00                                  | ---     |
|                                 | Borderline<br>(115-120 mg/dL)                                                        | 2.96 [1.27, 6.93]                     | 0.01    | 1.15 [0.69, 1.91]                     | 0.6     |
|                                 | Slightly elevated and decreasing<br>(drops from 145 mg/dL to 125<br>mg/dL over time) | 4.12 [1.76, 9.63]                     | 0.001   | 1.47 [0.89, 2.43]                     | 0.1     |
|                                 | Elevated and decreasing<br>(drops from 170 mg/dL to 135<br>mg/dL over time)          | 2.92 [1.13, 7.52]                     | 0.03    | 2.32 [1.31, 4.09]                     | 0.004   |
|                                 | Very elevated and decreasing<br>(drops from 220 mg/dL to 155<br>mg/dL over time)     | 5.11 [1.57, 16.69]                    | 0.007   | 4.33 [1.96, 9.57]                     | 0.0003  |

|                     |                                                                            |                    |        |                   |         |
|---------------------|----------------------------------------------------------------------------|--------------------|--------|-------------------|---------|
| Log Triglycerides   | Optimal (55-70 mg/dL)                                                      | 1.00               | ---    | 1.00              | ---     |
|                     | Borderline (81-99 mg/dL)                                                   | 1.35 [0.84, 2.16]  | 0.2    | 0.99 [0.69, 1.40] | 0.9     |
|                     | Elevated (134-164 mg/dL)                                                   | 1.83 [1.12, 3.01]  | 0.02   | 1.04 [0.69, 1.56] | 0.9     |
|                     | Very Elevated (245-314 mg/dL)                                              | 1.82 [0.83, 4.02]  | 0.1    | 0.78 [0.36, 1.68] | 0.5     |
| Non-HDL Cholesterol | Optimal (100-115 mg/dL)                                                    | 1.00               | ---    | 1.00              | ---     |
|                     | Borderline (145-137 mg/dL)                                                 | 3.36 [1.78, 6.37]  | 0.0002 | 1.40 [0.95, 2.08] | 0.09    |
|                     | Elevated and Decreasing (drops from 185 mg/dL to 157 mg/dL over time)      | 3.15 [1.57, 6.31]  | 0.001  | 1.63 [1.03, 2.59] | 0.04    |
|                     | Very elevated and decreasing (drops from 235 mg/dL to 180 mg/dL over time) | 4.57 [1.96, 10.65] | 0.0004 | 3.80 [2.06, 7.01] | <0.0001 |

\*CI – confidence interval; ASCVD – atherosclerotic cardiovascular disease; HDL – high-density lipoprotein; LDL – low-density lipoprotein.

† All models were adjusted for statin use, smoking status, diabetes status, body mass index, systolic blood pressure, total caloric intake, alcohol consumption, physical activity index, and antihypertensive medication use.

‡ HDL Trajectory Groups 4 & 5 were combined for analyses to increase statistical power since there were only 2 incident ASCVD events and 5 deaths in group 5.

**Table S7. Rates and Risk of Heart Failure by Lipid Trajectory Group.**

| Lipid                           | Group                                                                                | Events<br>no. at risk (%) | Hazard Ratio<br>[95% CI] <sup>†</sup> | p-value |
|---------------------------------|--------------------------------------------------------------------------------------|---------------------------|---------------------------------------|---------|
| Total<br>Cholesterol            | Optimal<br>(155-165 mg/dL)                                                           | 13/546 (2.38)             | 1.00                                  | ---     |
|                                 | Borderline<br>(190-200 mg/dL)                                                        | 34/1053 (3.23)            | 1.47 [0.70, 3.07]                     | 0.3     |
|                                 | Elevated<br>(220-235 mg/dL)                                                          | 12/581 (2.07)             | 1.17 [0.48, 2.85]                     | 0.7     |
|                                 | Elevated and decreasing<br>(drops from 260 mg/dL to 190 mg/dL over<br>time)          | 2/123 (1.63)              | 1.30 [0.22, 7.68]                     | 0.8     |
|                                 | Very elevated and decreasing<br>(drops from 285 mg/dL to 240 mg/dL over<br>time)     | 4/72 (5.56)               | 2.47[0.55, 11.14]                     | 0.2     |
| HDL<br>Cholesterol <sup>‡</sup> | Very low and stable<br>(35-40 mg/dL)                                                 | 20/462 (4.33)             | 2.65 [0.78, 8.96]                     | 0.1     |
|                                 | Low and stable<br>(45-50 mg/dL)                                                      | 25/779 (3.21)             | 2.41 [0.79, 7.34]                     | 0.1     |
|                                 | Borderline<br>(55-60 mg/dL)                                                          | 15/687 (2.18)             | 2.00 [0.65, 6.18]                     | 0.2     |
|                                 | High and increasing<br>(increases from 70/80 mg/dL to 75/100<br>mg/dL over time)     | 4/425 (0.94)              | 1.00                                  | ---     |
| LDL<br>Cholesterol              | Optimal<br>(80-90 mg/dL)                                                             | 4/317 (1.26)              | 1.00                                  | ---     |
|                                 | Borderline<br>(115-120 mg/dL)                                                        | 21/821 (2.56)             | 1.74 [0.58, 5.23]                     | 0.3     |
|                                 | Slightly elevated and decreasing<br>(drops from 145 mg/dL to 125 mg/dL over<br>time) | 22/713 (3.09)             | 2.13 [0.71, 6.41]                     | 0.2     |
|                                 | Elevated and decreasing<br>(drops from 170 mg/dL to 135 mg/dL over<br>time)          | 8/296 (2.70)              | 1.83 [0.48, 6.95]                     | 0.4     |
|                                 | Very elevated and decreasing<br>(drops from 220 mg/dL to 155 mg/dL over<br>time)     | 2/45 (4.44)               | 4.54[0.75, 27.30]                     | 0.1     |

|                     |                                                                            |                |                   |      |
|---------------------|----------------------------------------------------------------------------|----------------|-------------------|------|
| Log Triglycerides   | Optimal (55-70 mg/dL)                                                      | 13/576 (2.26)  | 1.00              | ---  |
|                     | Borderline (81-99 mg/dL)                                                   | 25/997 (2.51)  | 0.80 [0.40, 1.62] | 0.5  |
|                     | Elevated (134-164 mg/dL)                                                   | 17/537 (3.17)  | 0.68 [0.29, 1.58] | 0.4  |
|                     | Very Elevated (245-314 mg/dL)                                              | 2/95 (2.11)    | 0.38 [0.08, 1.76] | 0.2  |
| Non-HDL Cholesterol | Optimal (100-115 mg/dL)                                                    | 7/534 (1.31)   | 1.00              | ---  |
|                     | Borderline (145-137 mg/dL)                                                 | 35/1044 (3.35) | 1.80 [0.75, 4.30] | 0.2  |
|                     | Elevated and Decreasing drops from 185 mg/dL to 157 mg/dL over time)       | 9/537 (1.68)   | 0.96 [0.32, 2.88] | 0.9  |
|                     | Very elevated and decreasing (drops from 235 mg/dL to 180 mg/dL over time) | 6/92 (6.52)    | 3.53[0.99, 12.46] | 0.05 |

\*CI – confidence interval; HDL – high-density lipoprotein; LDL – low-density lipoprotein.

† All models were adjusted for statin use, smoking status, diabetes status, body mass index, and systolic blood pressure. Alcohol consumption was also adjusted for in total cholesterol, HDL-C and LDL-C models. Total caloric intake was adjusted for in LDL-C and triglyceride models. Physical activity index was adjusted for in HDL-C, triglyceride, and non-HDL-C models. Use of antihypertensive medications were adjusted for in total cholesterol, LDL-C and triglyceride models. Baseline hazards were allowed to differ for men and women in all models.

‡ HDL Trajectory Groups 4 & 5 were combined for analyses to increase statistical power since there were only 2 incident CVD events and 5 deaths in group 5.

**Figure S1. Timeline and Sample selection.**

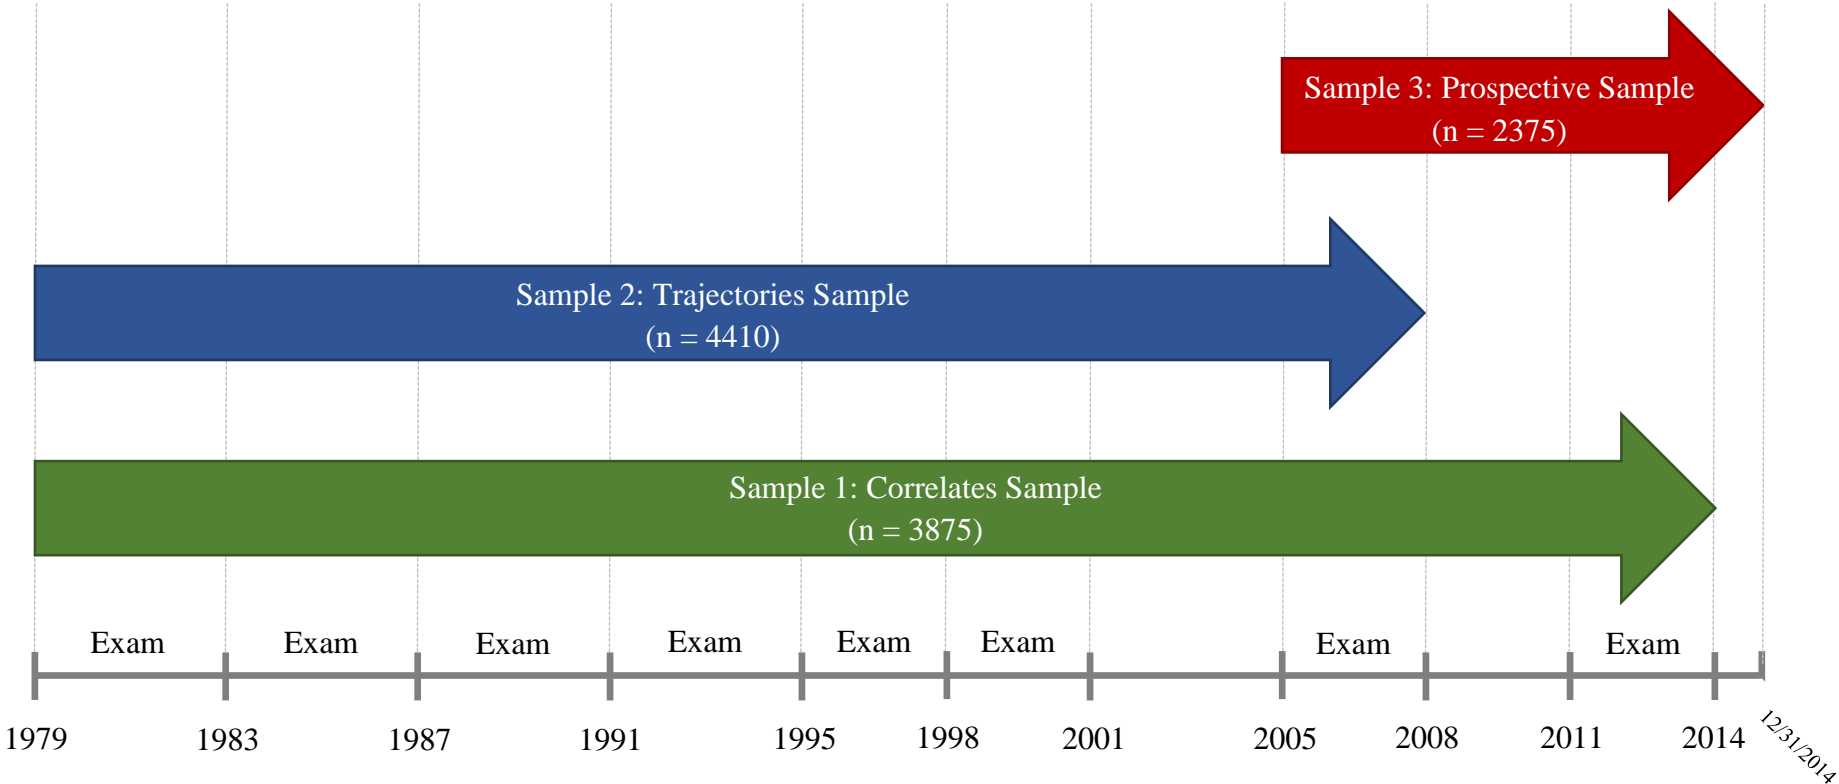

**Figure S2. Generation of samples used to assess the correlates of the lipids under study.\***

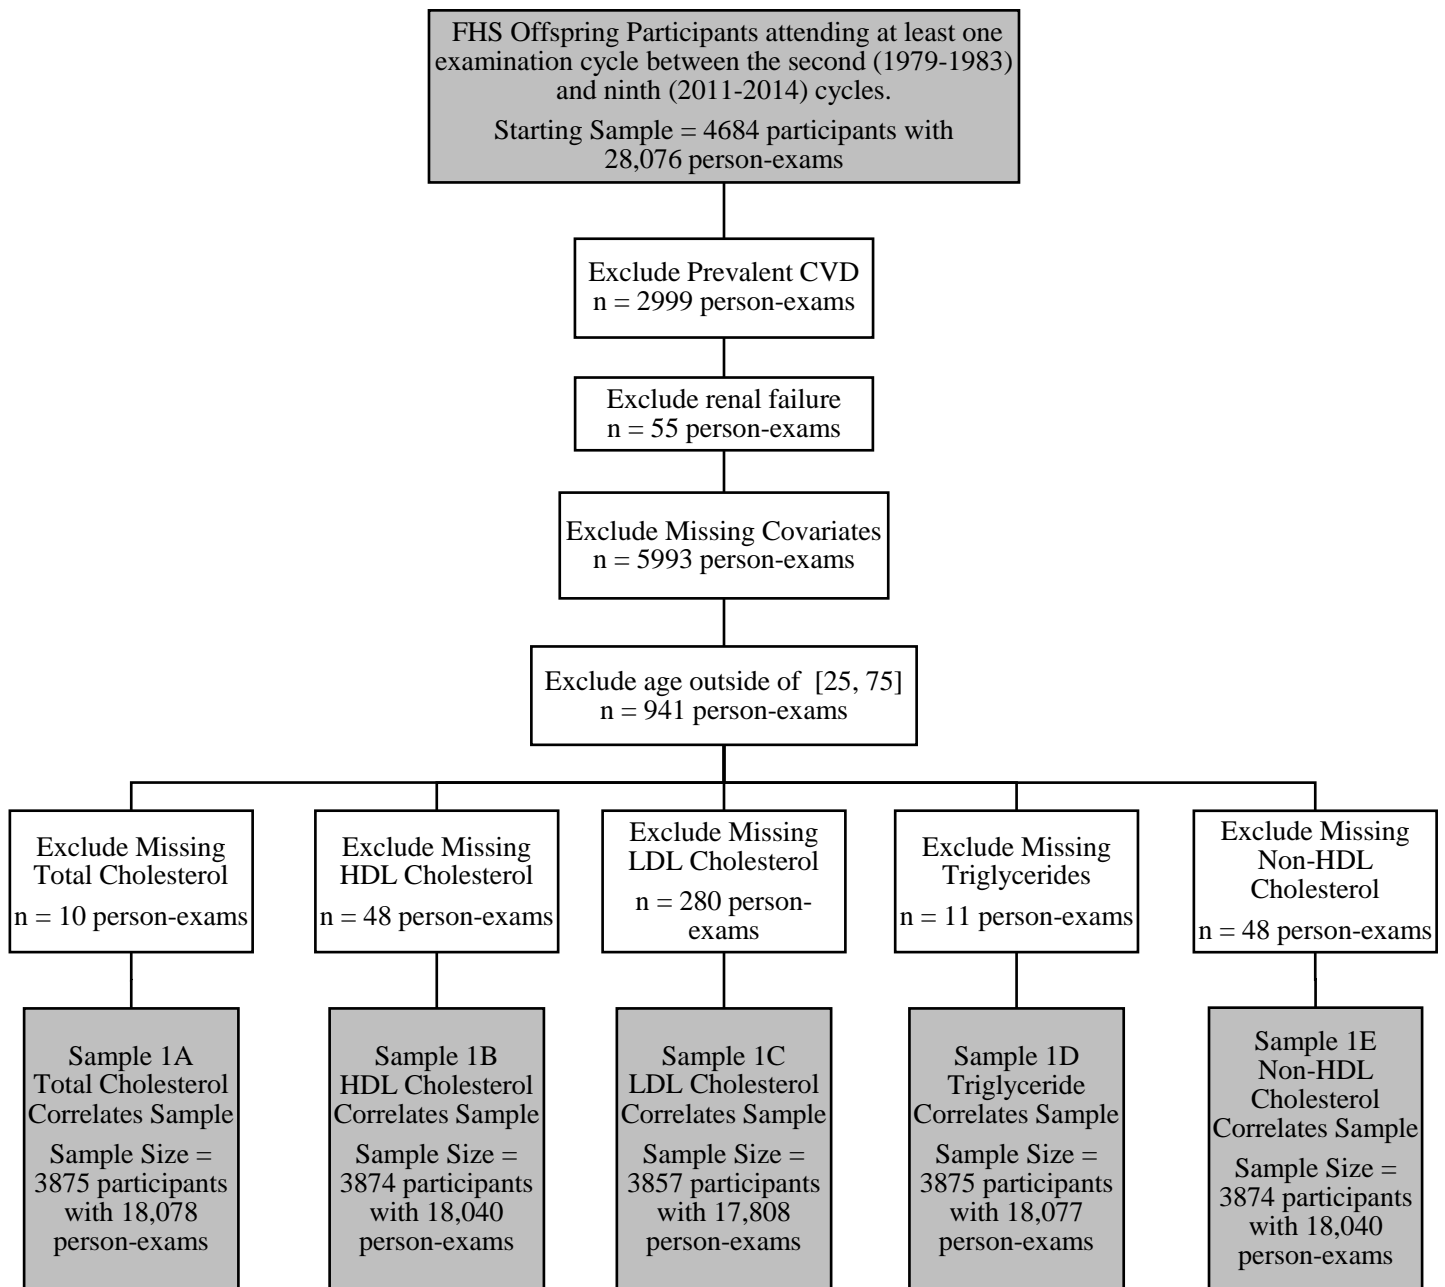

\*CVD – cardiovascular disease; FHS – Framingham Heart Study; HDL – high-density lipoprotein; LDL – low-density lipoprotein.

**Figure S3. Generation of samples used to create trajectories of lipids.\***

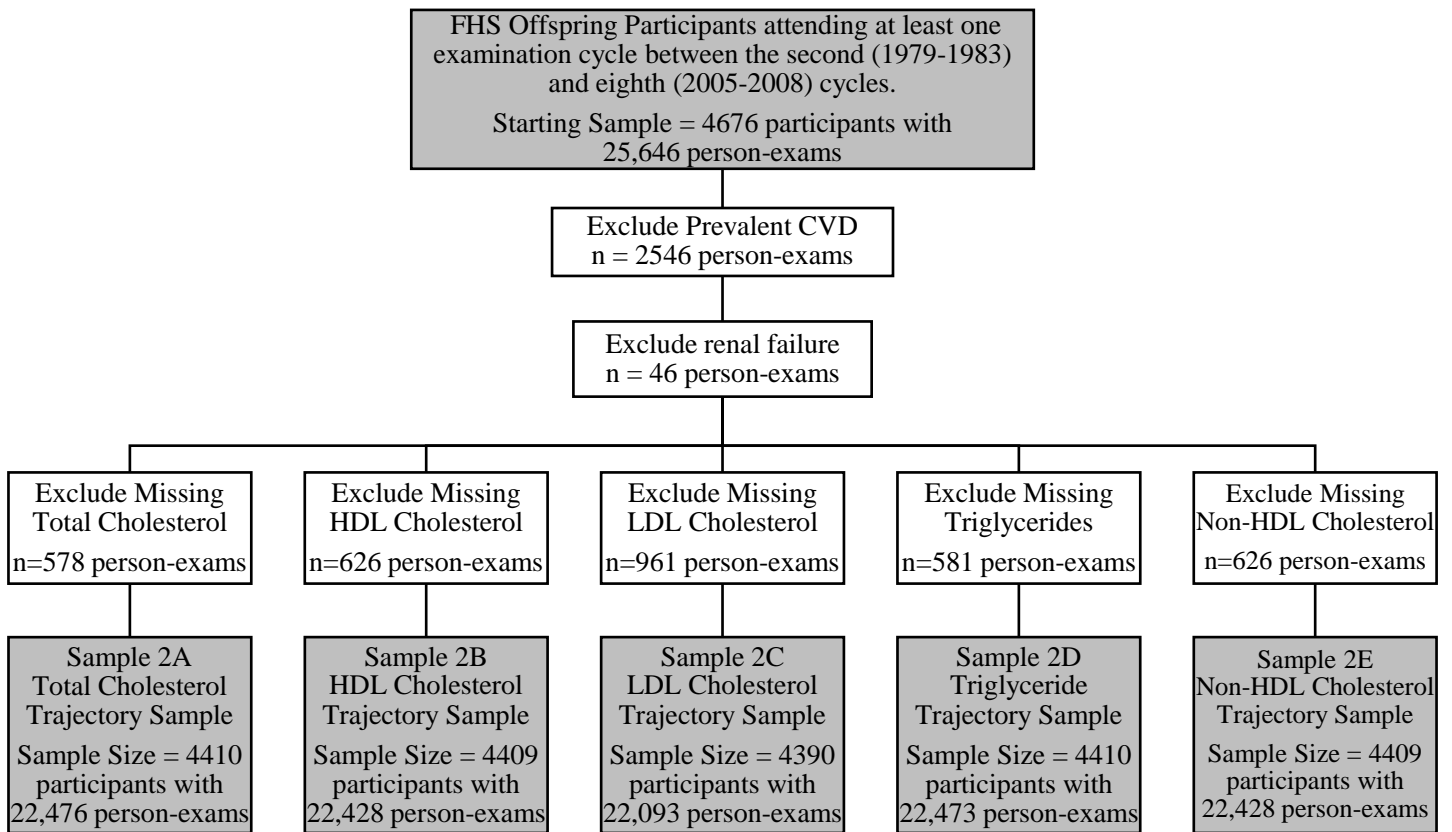

\*CVD – cardiovascular disease; FHS – Framingham Heart Study; HDL – high-density lipoprotein; LDL – low-density lipoprotein.



**Figure S4. Generation of samples used for incidence analyses.\***

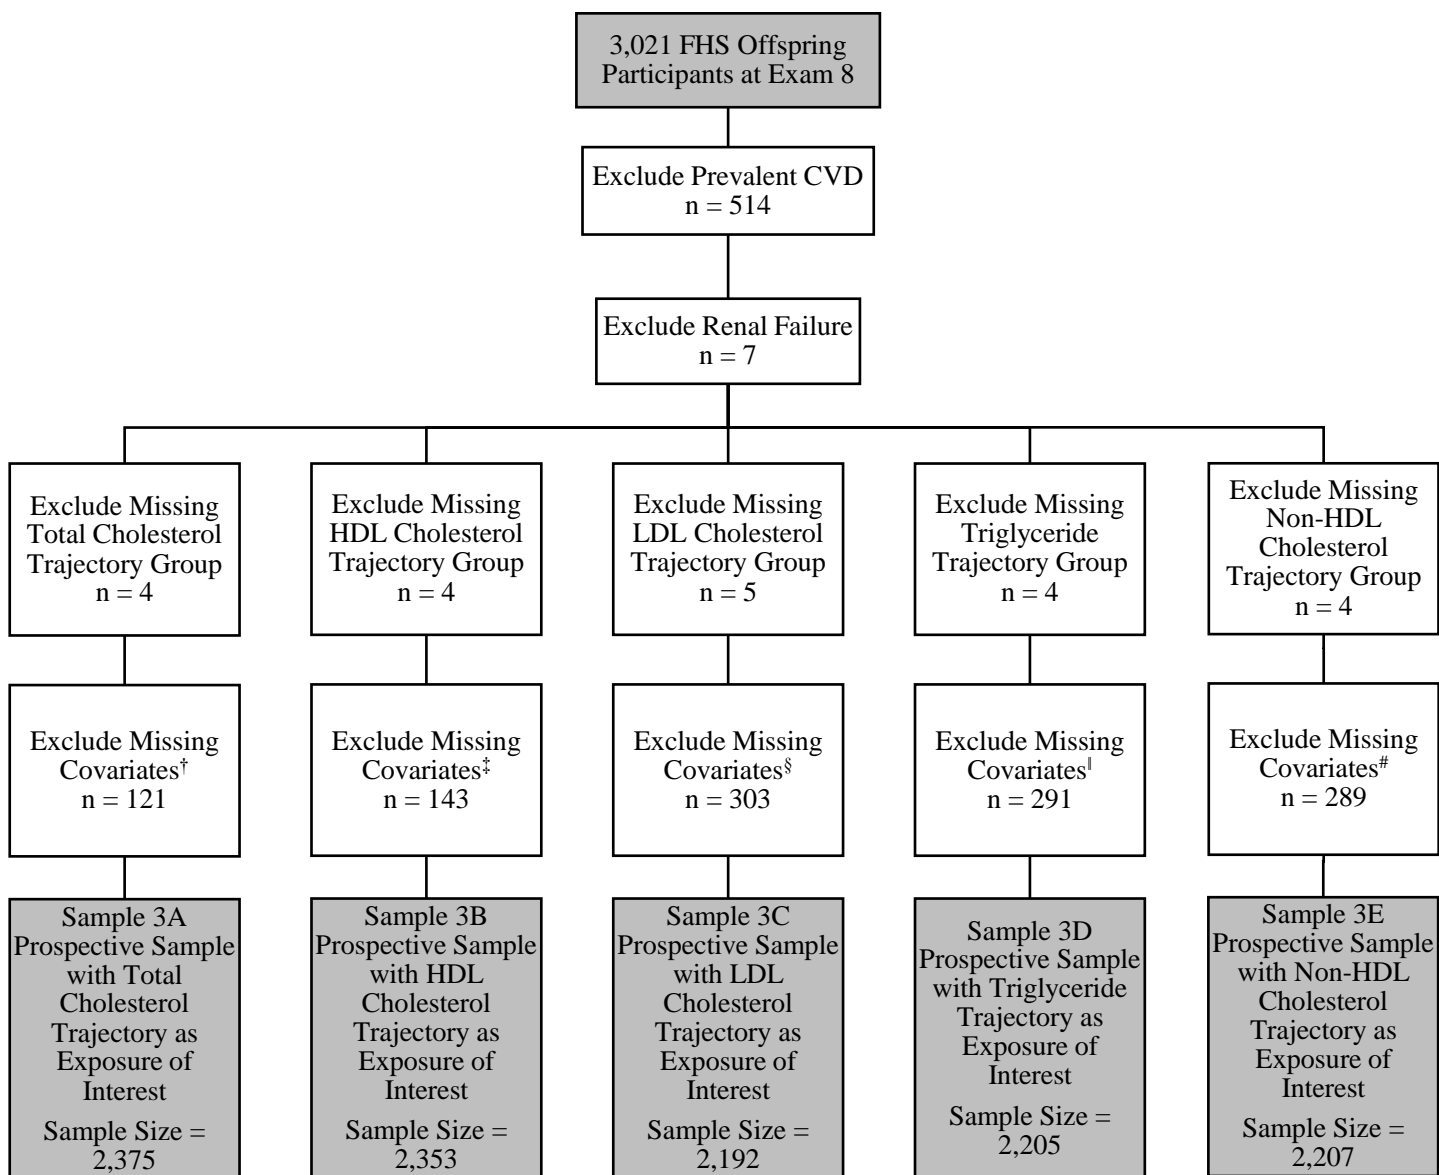

\*CVD – cardiovascular disease; FHS – Framingham Heart Study; HDL – high-density lipoprotein; LDL – low-density lipoprotein.

† Covariates: Lipid-lowering medication, smoking status, diabetes, body mass index, systolic blood pressure, moderate-to-heavy drinking, and antihypertensive medication

‡ Covariates: Lipid-lowering medication, smoking status, diabetes, body mass index, systolic blood pressure, moderate-to-heavy drinking, and physical activity index

§ Covariates: Lipid-lowering medication, smoking status, diabetes, body mass index, systolic blood pressure, moderate-to-heavy drinking, total caloric intake, and antihypertensive medication

|| Covariates: Lipid-lowering medication, smoking status, diabetes, body mass index, systolic blood pressure, total caloric intake, physical activity index, and antihypertensive medication

# Covariates: Lipid-lowering medication, smoking status, diabetes, body mass index, systolic blood pressure, total caloric intake, and physical activity index

**Figure S5. Lipid Trajectory Plots among participants not on lipid-lowering treatment.**

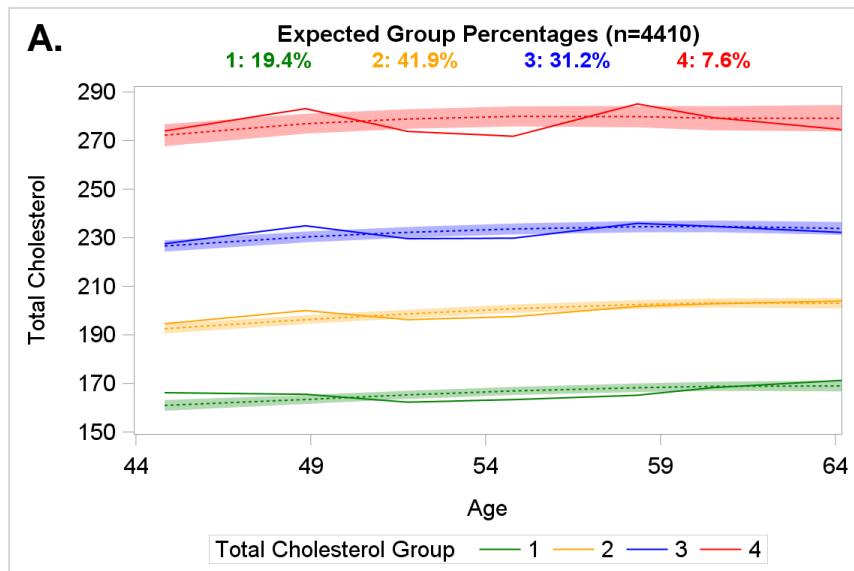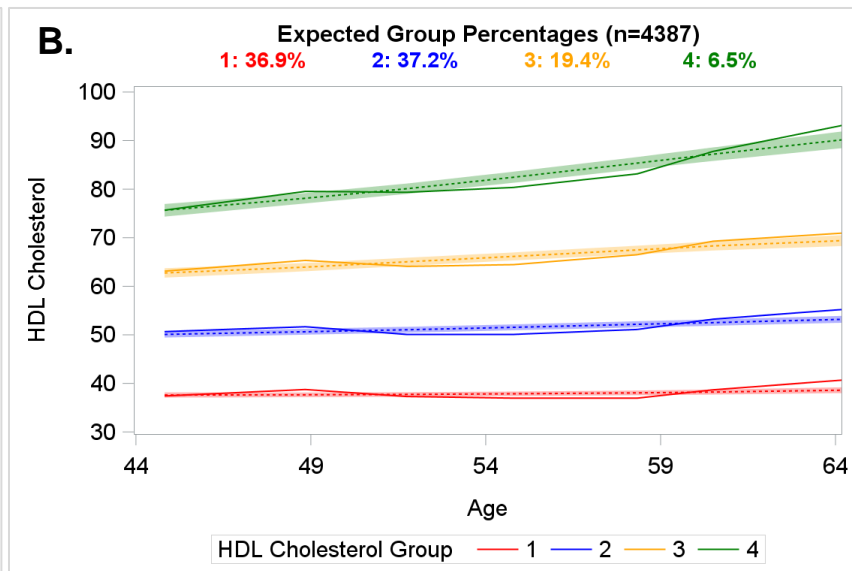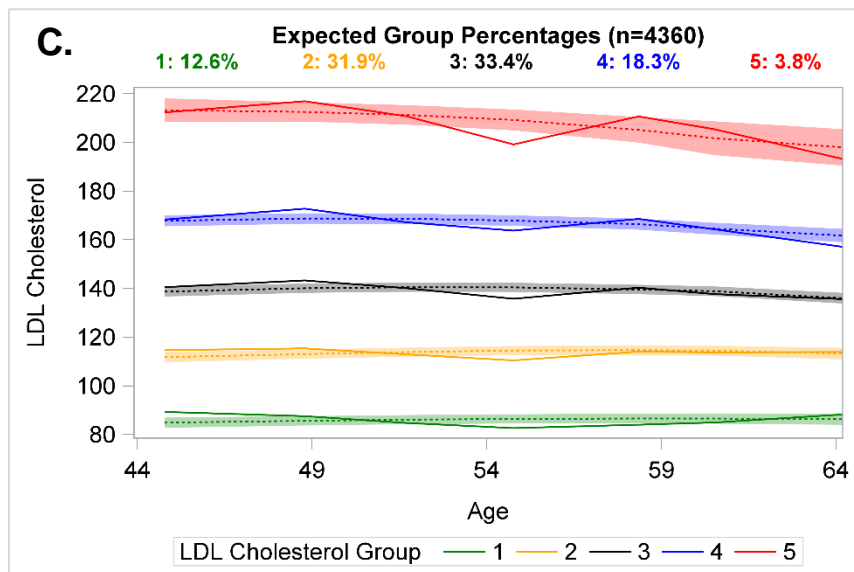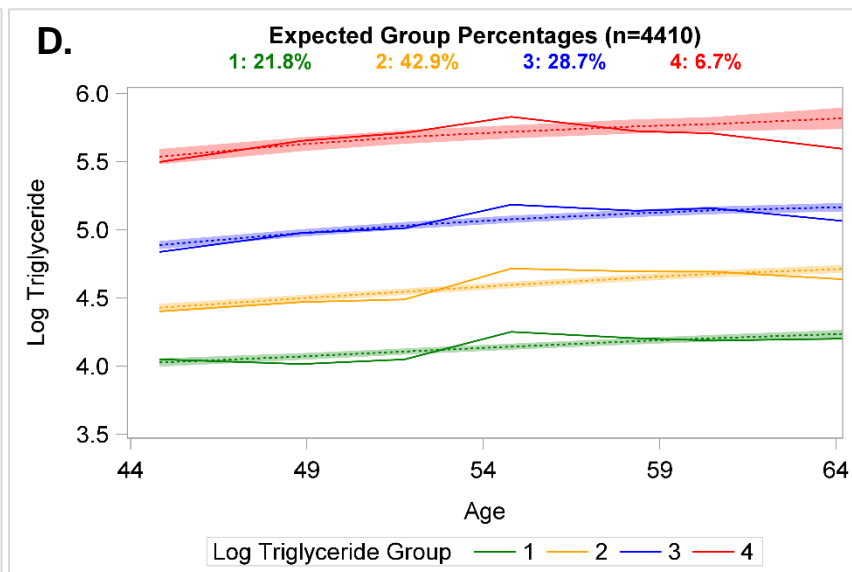

**E.**

**Expected Group Percentages (n=4387)**

1: 17.0%    2: 38.9%    3: 34.3%    4: 9.8%

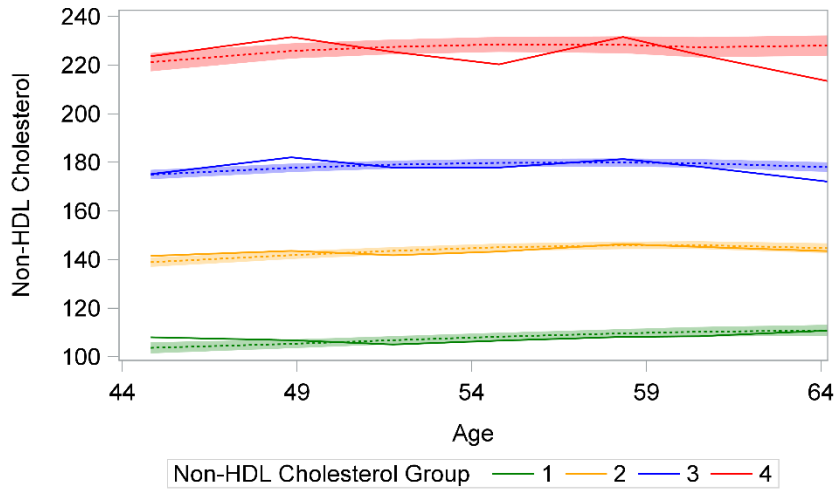

**Figure S6. Kaplan-Meier Curves for ASCVD Stratified by Trajectory Groups.**

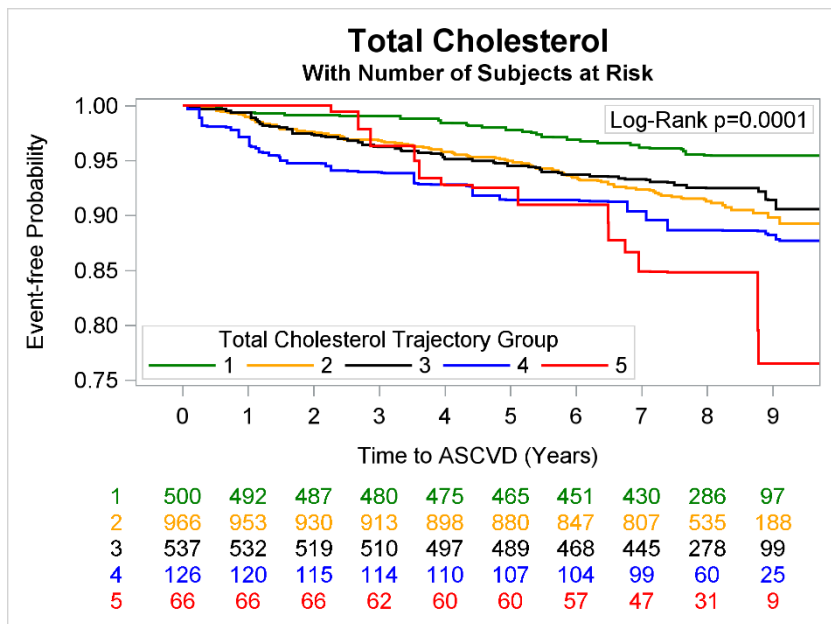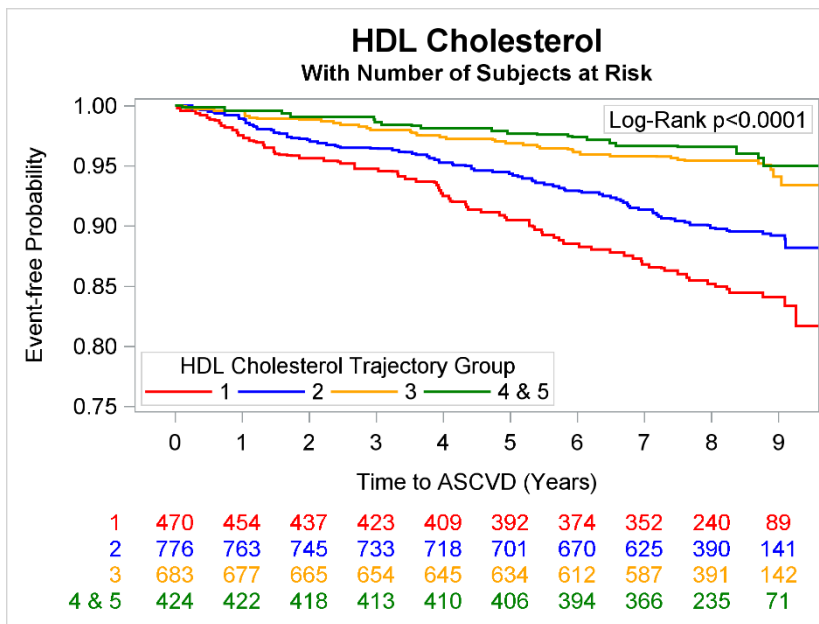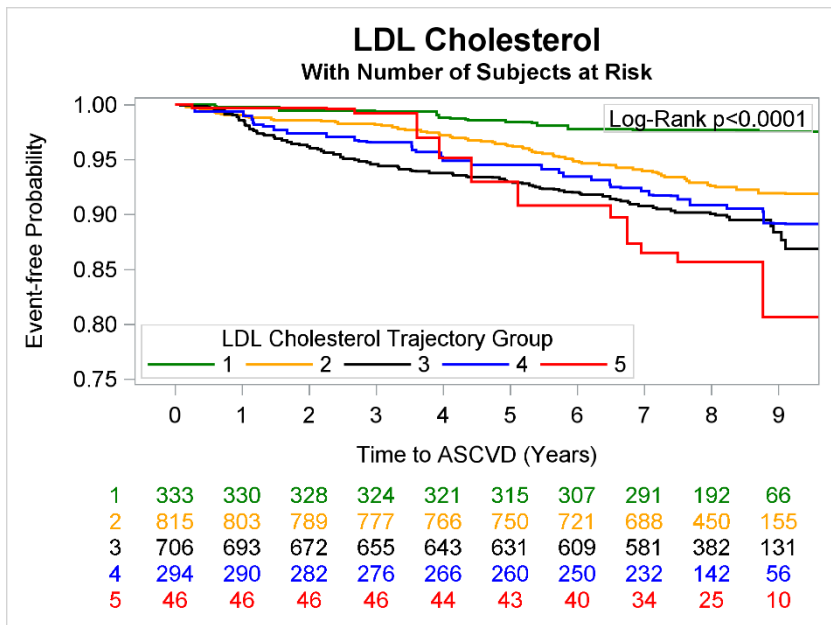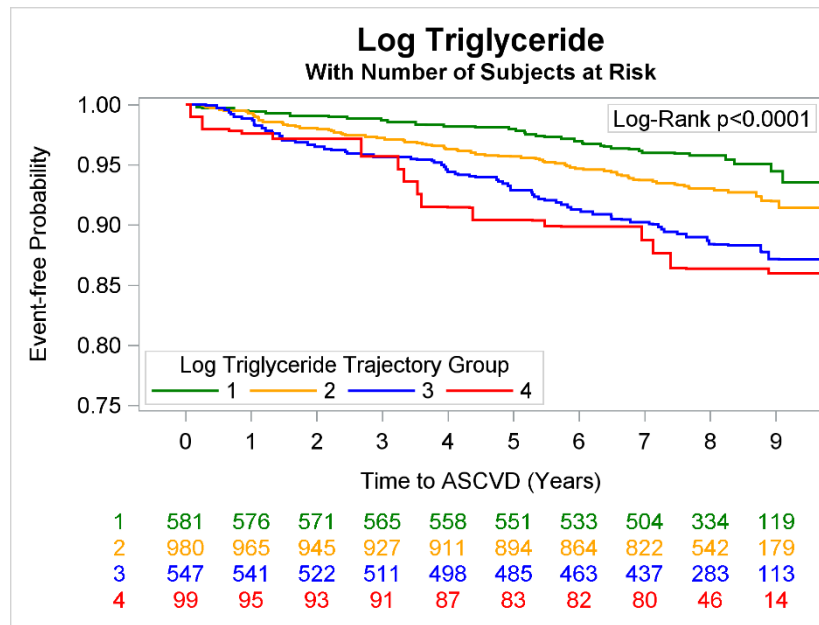

# Non-HDL Cholesterol

## With Number of Subjects at Risk

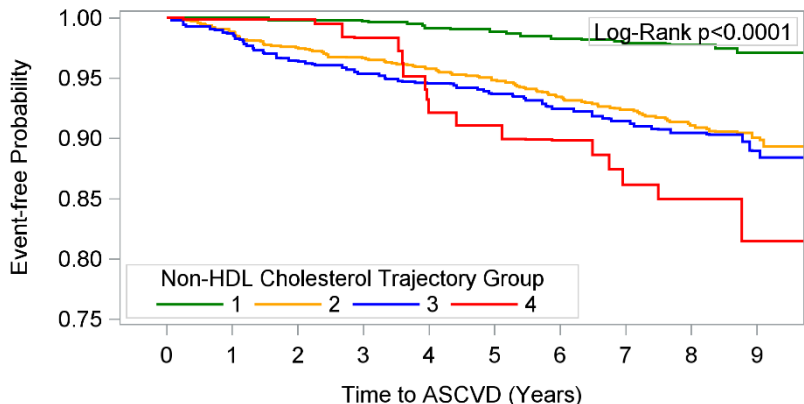

|   |      |      |     |     |     |     |     |     |     |     |
|---|------|------|-----|-----|-----|-----|-----|-----|-----|-----|
| 1 | 542  | 537  | 535 | 529 | 524 | 518 | 507 | 479 | 316 | 107 |
| 2 | 1030 | 1014 | 988 | 968 | 952 | 930 | 891 | 851 | 560 | 197 |
| 3 | 542  | 532  | 516 | 506 | 494 | 483 | 466 | 445 | 286 | 105 |
| 4 | 93   | 92   | 92  | 91  | 84  | 82  | 79  | 67  | 42  | 17  |

**Figure S7. Kaplan-Meier Curves for All-Cause Mortality Stratified by Trajectory Groups.**

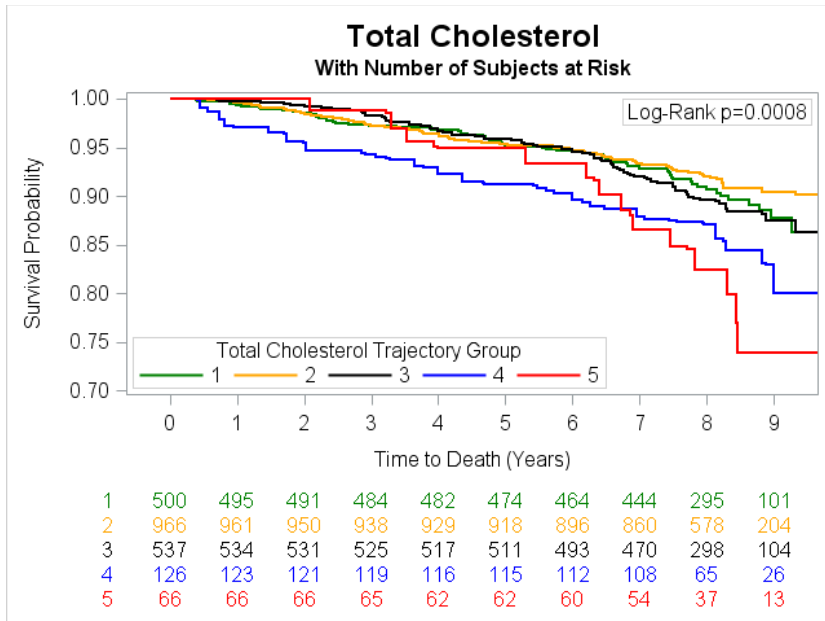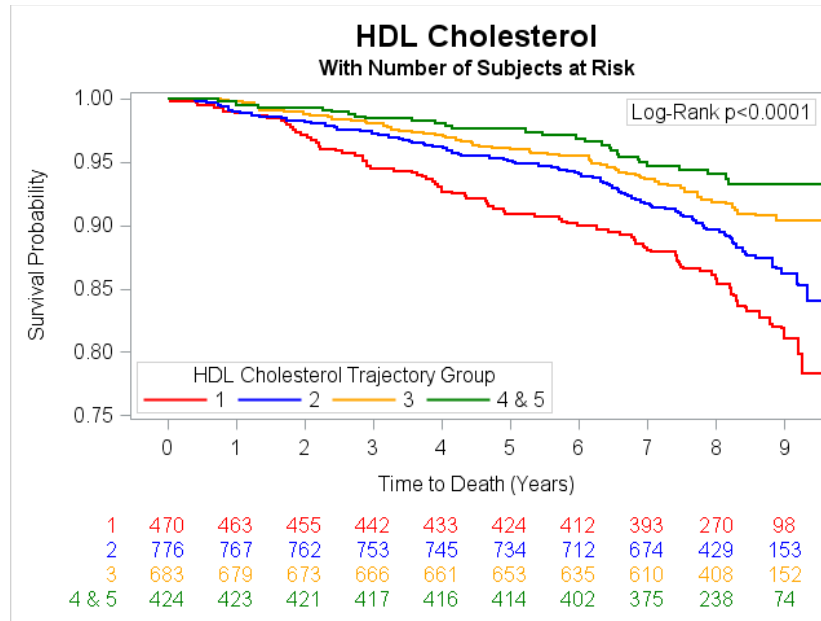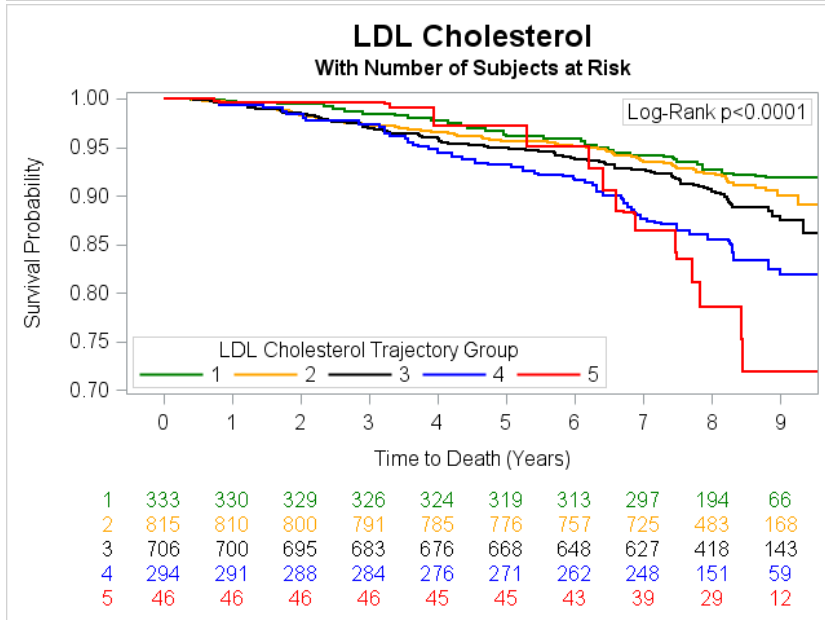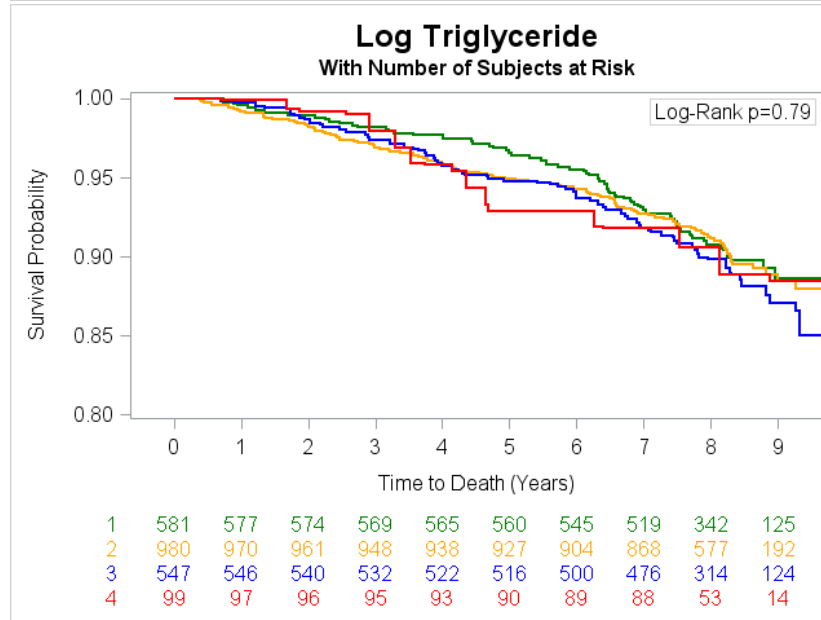

## Non-HDL Cholesterol With Number of Subjects at Risk

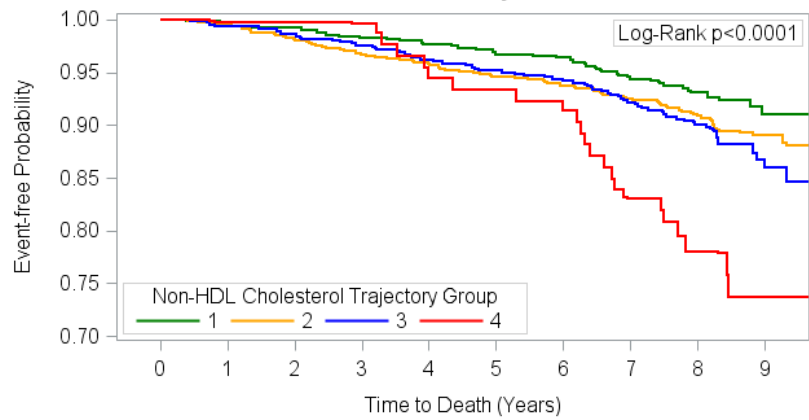

|   |      |      |      |     |     |     |     |     |     |     |
|---|------|------|------|-----|-----|-----|-----|-----|-----|-----|
| 1 | 542  | 538  | 536  | 531 | 527 | 523 | 513 | 486 | 318 | 108 |
| 2 | 1030 | 1023 | 1010 | 994 | 985 | 971 | 942 | 908 | 607 | 216 |
| 3 | 542  | 537  | 534  | 527 | 519 | 512 | 500 | 482 | 313 | 111 |
| 4 | 93   | 92   | 92   | 92  | 87  | 86  | 83  | 74  | 47  | 20  |
